# Supplementary material for: First-in-Human Stage III/IV Melanoma Clinical Trial of Immune Priming Agent IFx-Hu2.0
Source: PubMed Central journal article supplement — Mol Cancer Ther. 2024 Apr 24;23(8):1139–43. doi: 10.1158/1535-7163.MCT-23-0652 (PMC11292317; doi:10.1158/1535-7163.mct-23-0652), 2024-04-24
Supplement: mct-23-0652_supplemental_figure_1_suppsf1.pdf [file mct-23-0652_supplemental_figure_1_suppsf1.pdf]

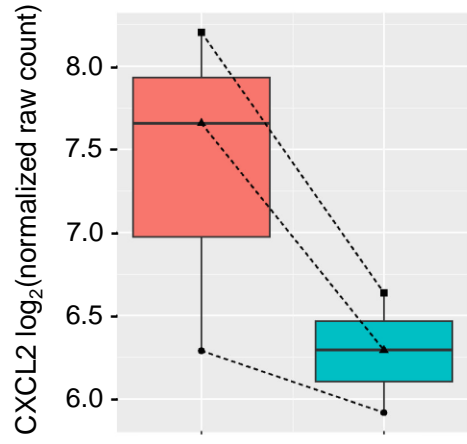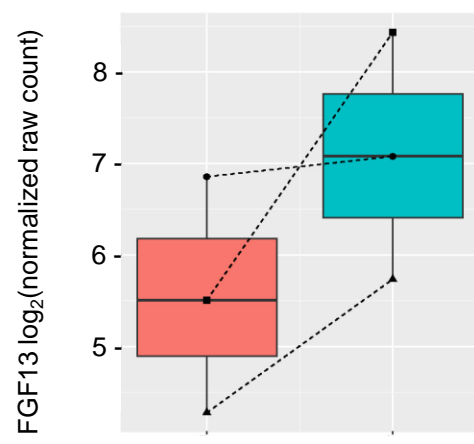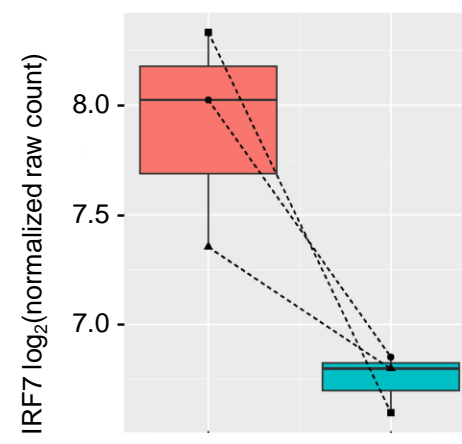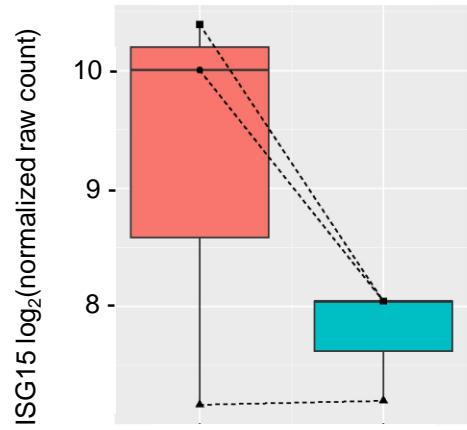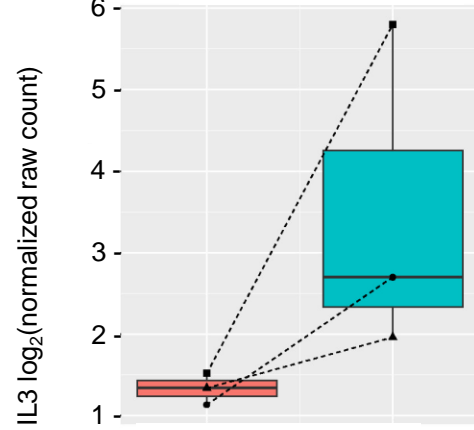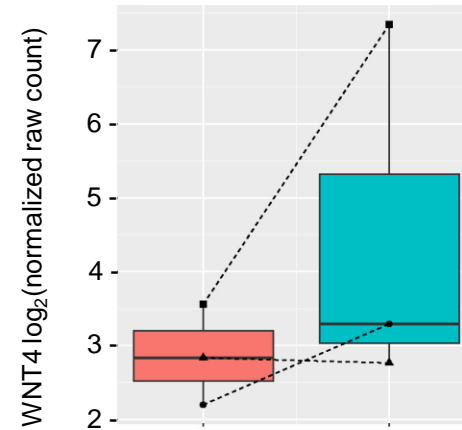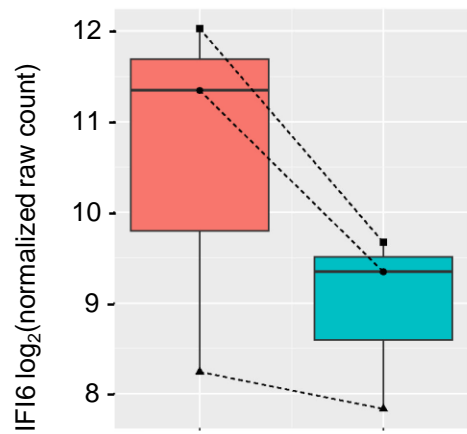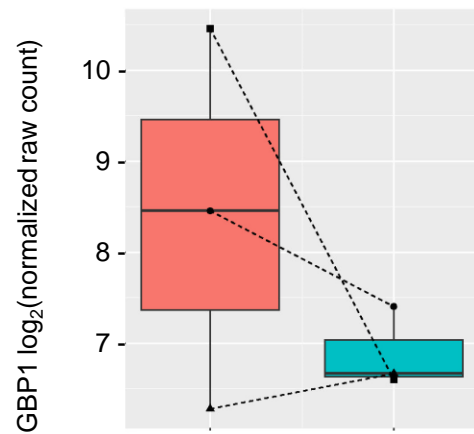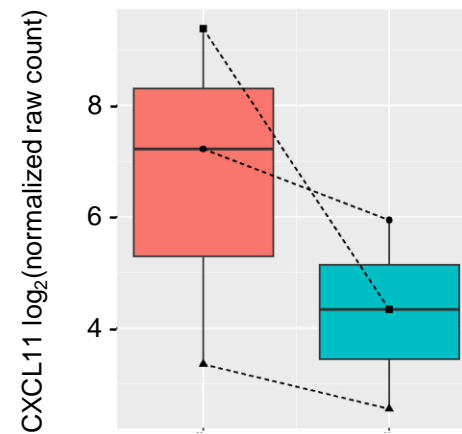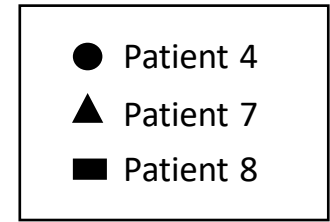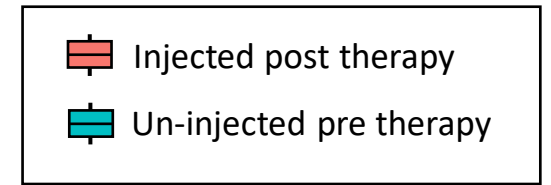

Supplemental Figure 1: Box plot of genes depicted in Figure 1. Nanostring provides count data for genes and the y-axis is the  $\log_2(\text{normalized raw count})$

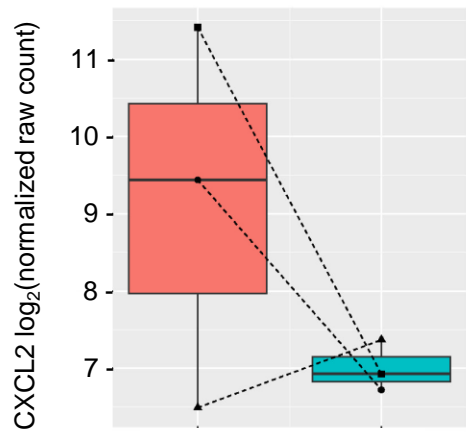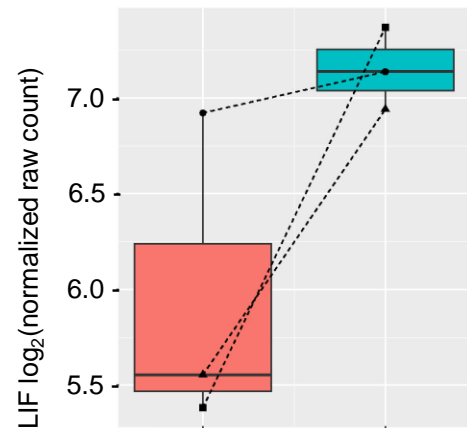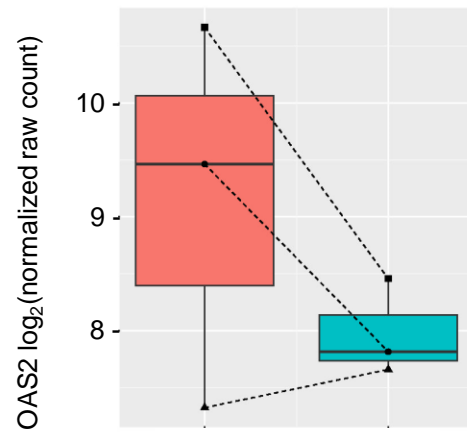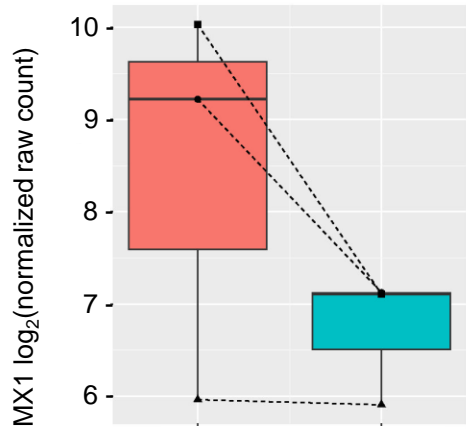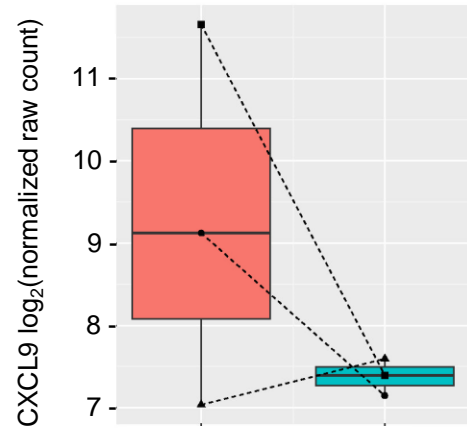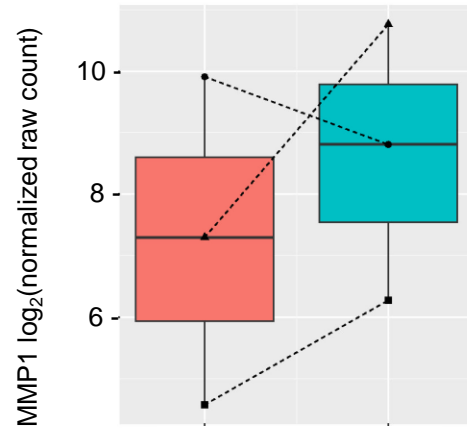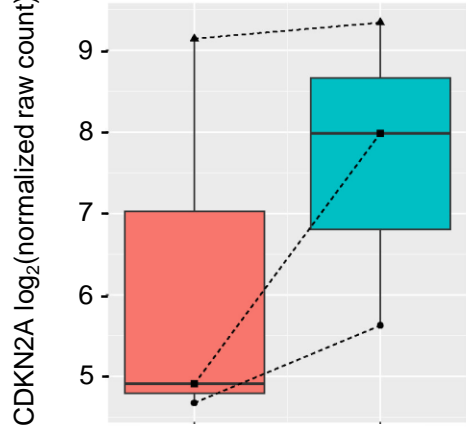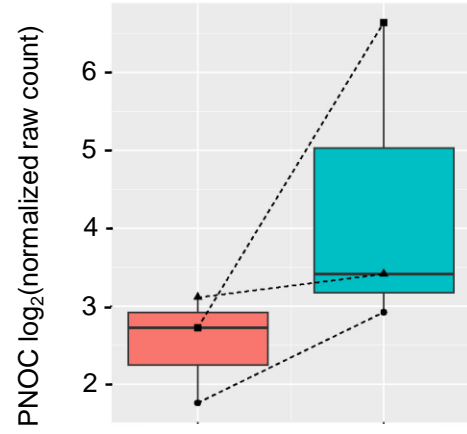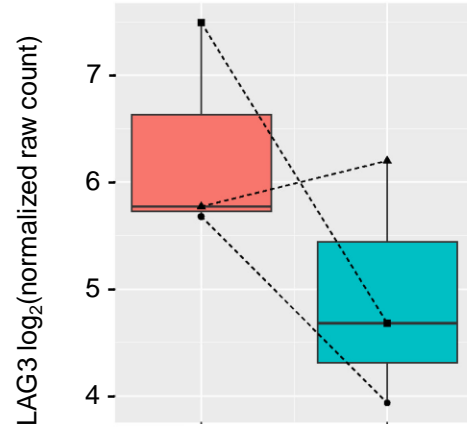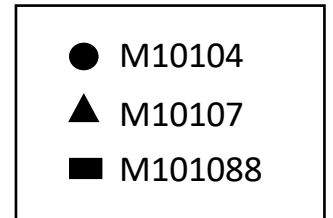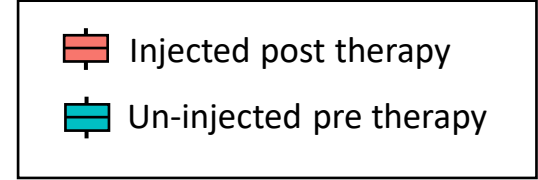

Supplemental Figure 1: Box plot of genes depicted in Figure 1. Nanostring provides count data for genes and the y-axis is the log<sub>2</sub>(normalized raw count)

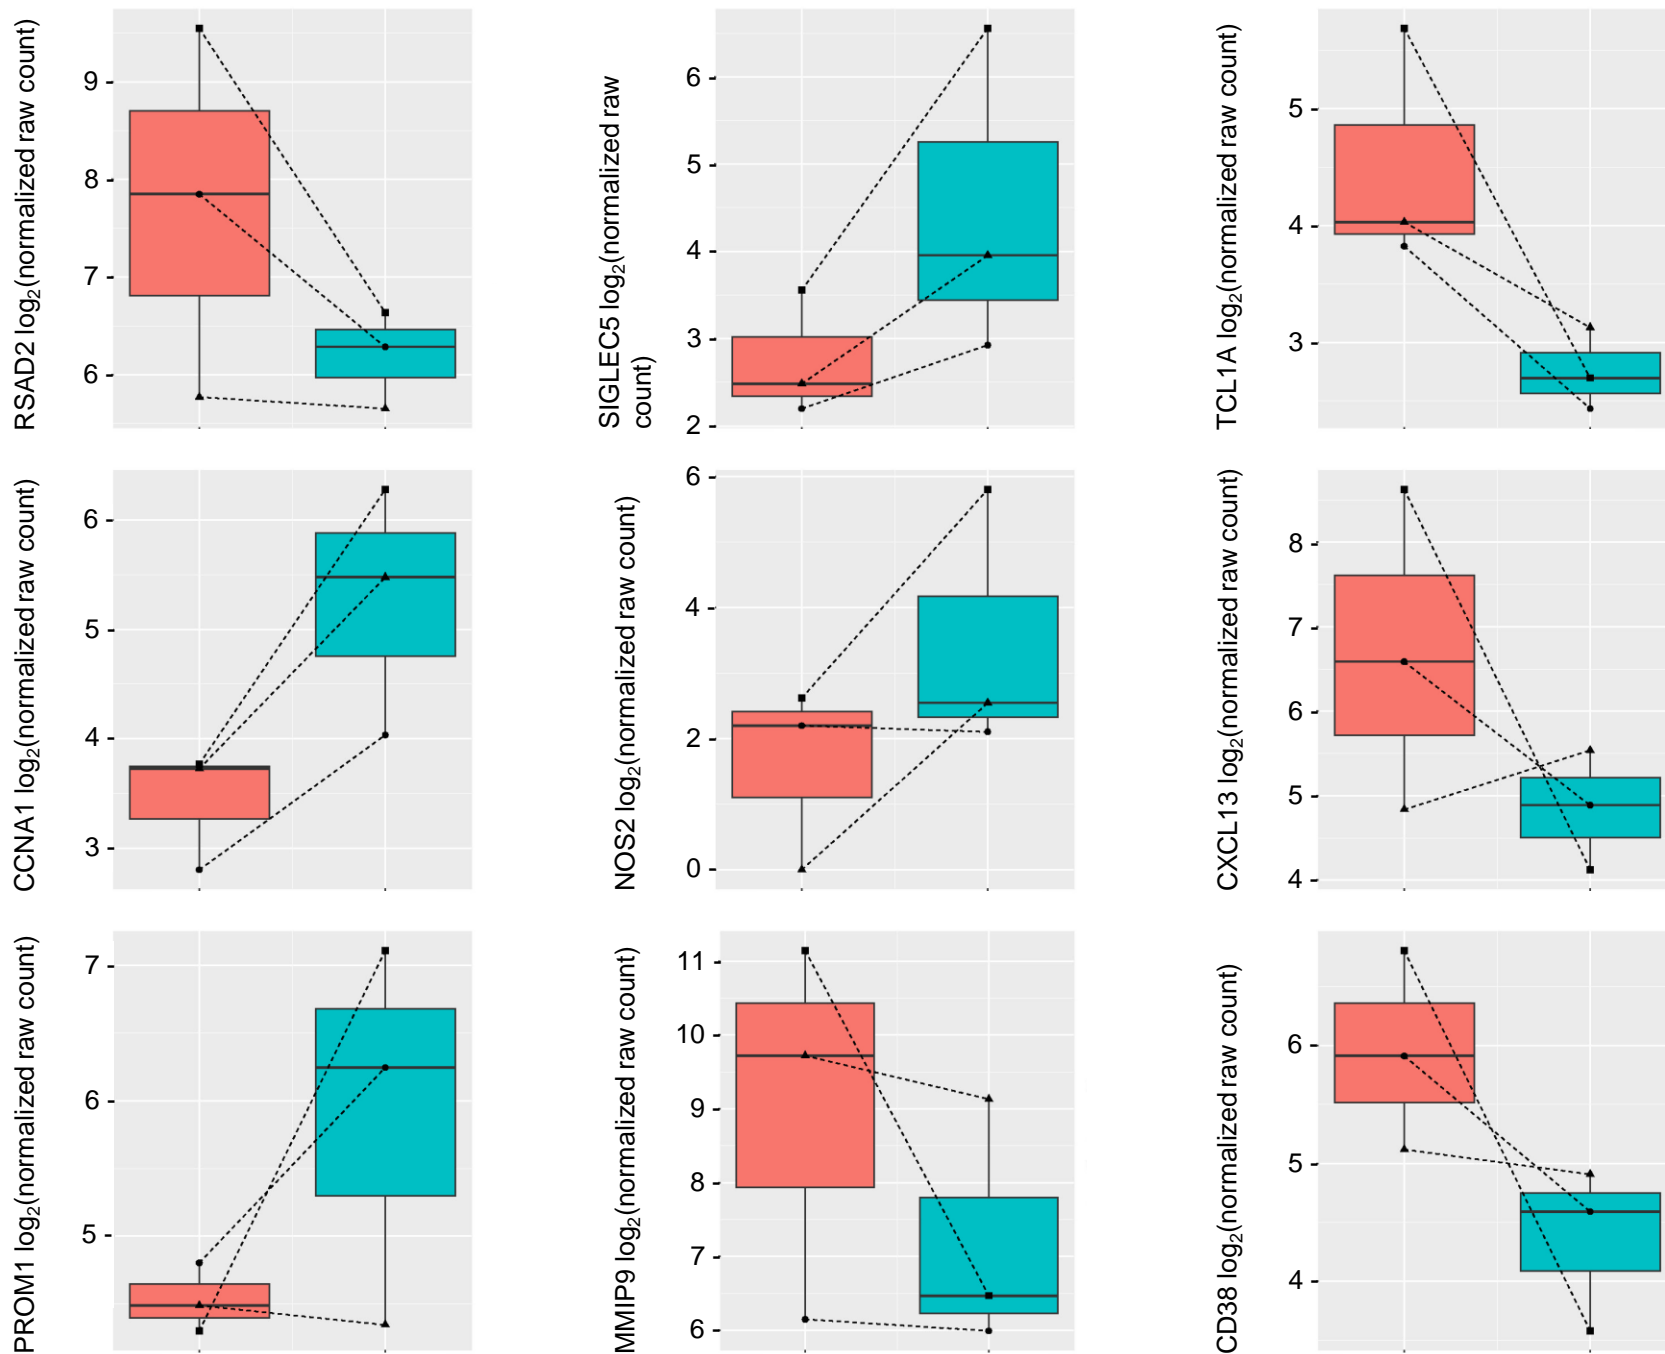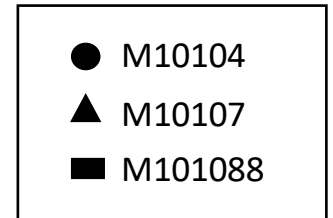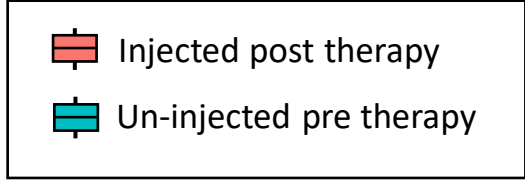

Supplemental Figure 1: Box plot of genes depicted in Figure 1. Nanostring provides count data for genes and the y-axis is the  $\log_2(\text{normalized raw count})$

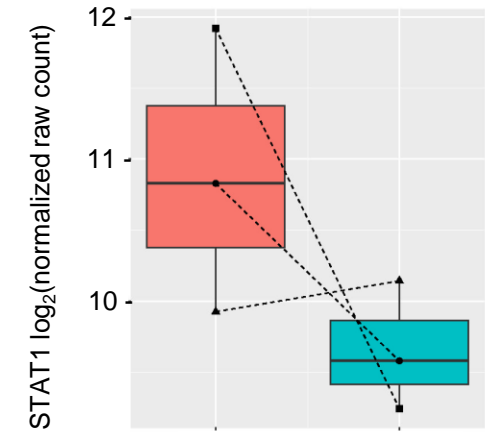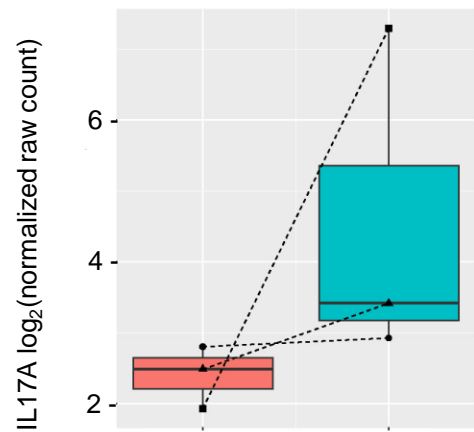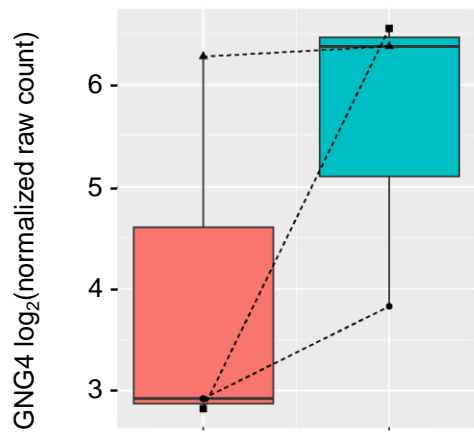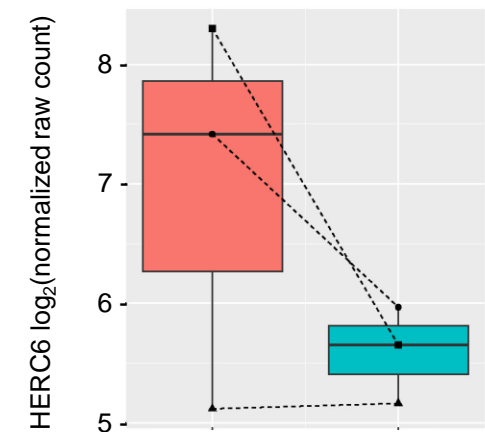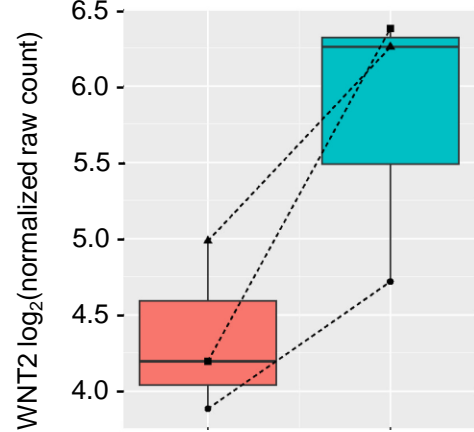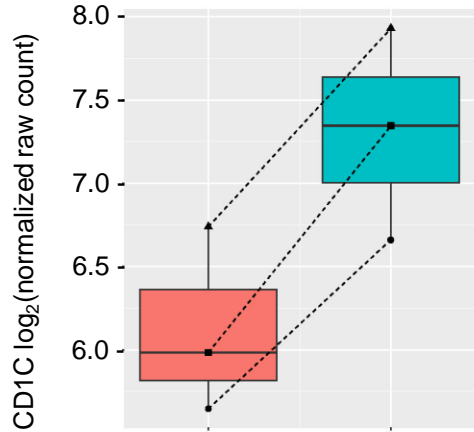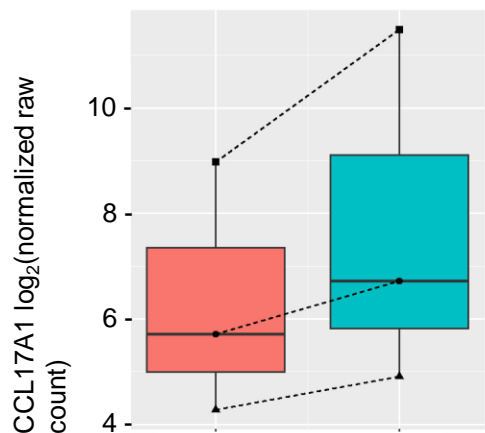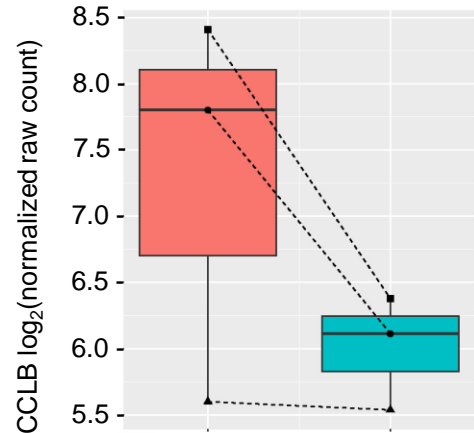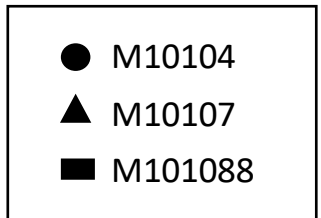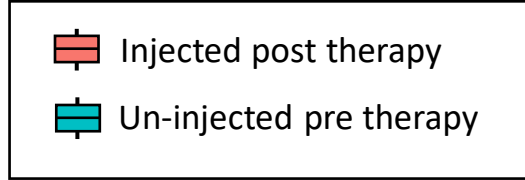

Supplemental Figure 1: Box plot of genes depicted in Figure 1. Nanostring provides count data for genes and the y-axis is the log<sub>2</sub>(normalized raw count)
