# Supplementary material for: First-in-Human Stage III/IV Melanoma Clinical Trial of Immune Priming Agent IFx-Hu2.0
Source: PubMed Central journal article supplement — Mol Cancer Ther. 2024 Apr 24;23(8):1139–43. doi: 10.1158/1535-7163.MCT-23-0652 (PMC11292317; doi:10.1158/1535-7163.mct-23-0652), 2024-04-24
Supplement: mct-23-0652_supplemental_figure_3_suppsf3.pdf [file mct-23-0652_supplemental_figure_3_suppsf3.pdf]

### Supplemental Figure 3

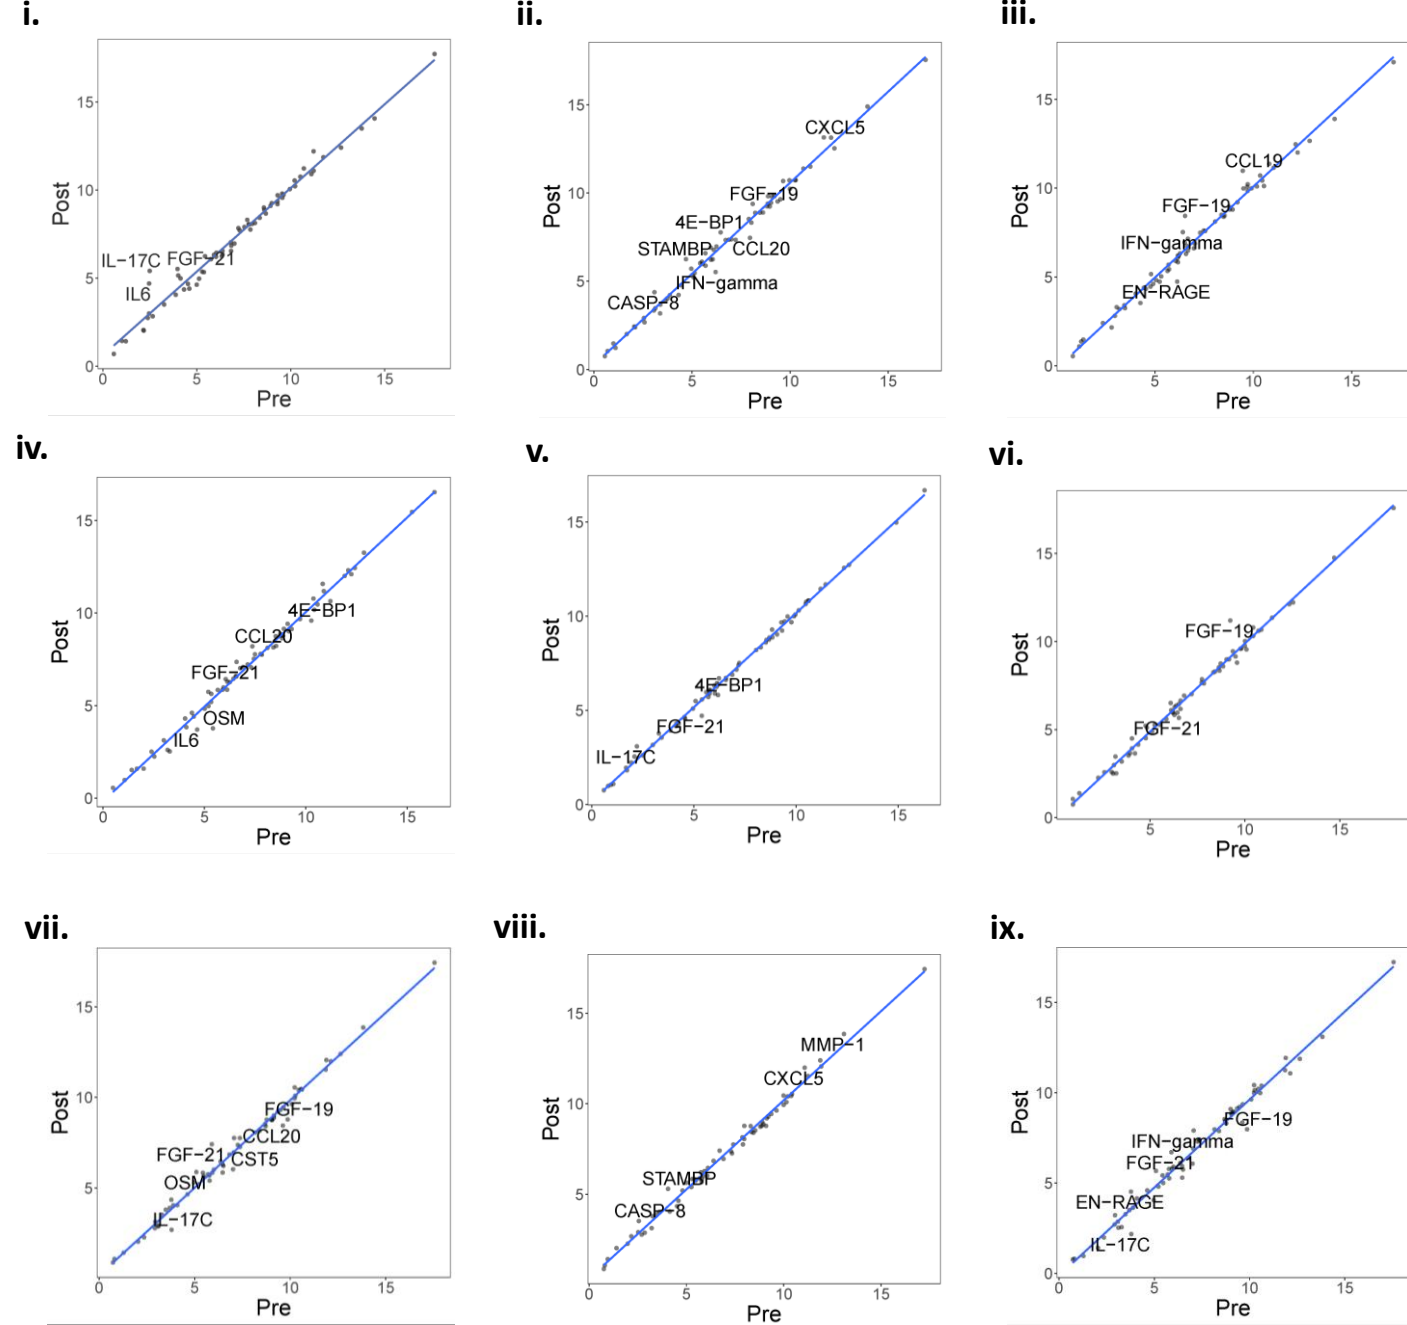

Supplemental Figure 3: Cytokine/chemokines increased or decreased after therapy in individual patients with the INF panel. i: M10101, ii: M10103, iii: M10104, iv: M10105, v: M10106, vi: M10107, vii: M10108 (pre vs post 1<sup>st</sup> injection), viii: M10108 (pre vs post 2<sup>nd</sup> injection), ix: M10108 (pre 2<sup>nd</sup> injection (~4 weeks post 1<sup>st</sup> injection) vs post 2<sup>nd</sup> injection). On the axes are the relative Normalized Protein eXpression (NPx) values provided by Olink on the log<sub>2</sub> scale.
