# Supplementary material for: First-in-Human Stage III/IV Melanoma Clinical Trial of Immune Priming Agent IFx-Hu2.0
Source: PubMed Central journal article supplement — Mol Cancer Ther. 2024 Apr 24;23(8):1139–43. doi: 10.1158/1535-7163.MCT-23-0652 (PMC11292317; doi:10.1158/1535-7163.mct-23-0652), 2024-04-24

Supplemental Figure 5:  
 Emm55 specific peptides  
 responsible for IgG  
 responses pre and post-  
 treatment on individual  
 patients.

i: M10101

ii: M10103

iii: M10104

iv: M10105

v: M10106

vi: M10107

vii: M10108 (pre vs post  
 1<sup>st</sup> injection)

viii: M10108 ( pre vs post  
 2<sup>nd</sup> injection)

ix: M10108 (pre 2<sup>nd</sup>  
 injection (~4 weeks post  
 1<sup>st</sup> injection) vs post 2<sup>nd</sup>  
 injection). The axes are  
 log2 transformation of  
 the counts of the  
 peptides [Normalized  
 protein expression (NPX)  
 per vendor]

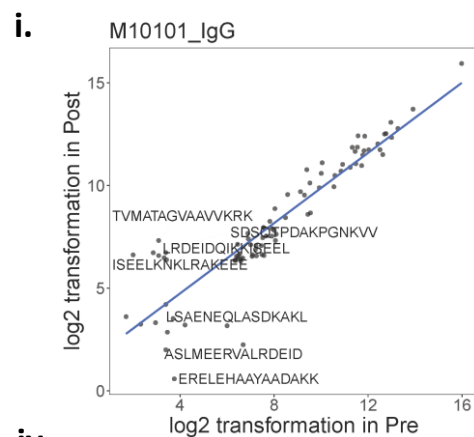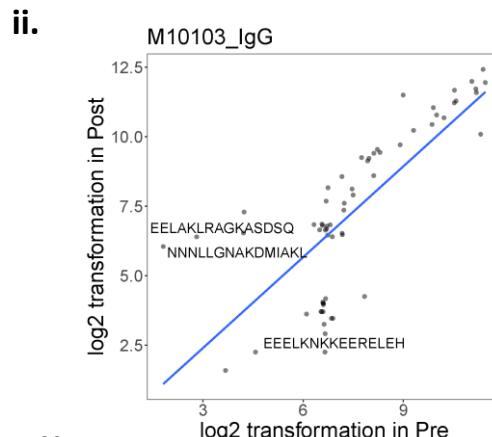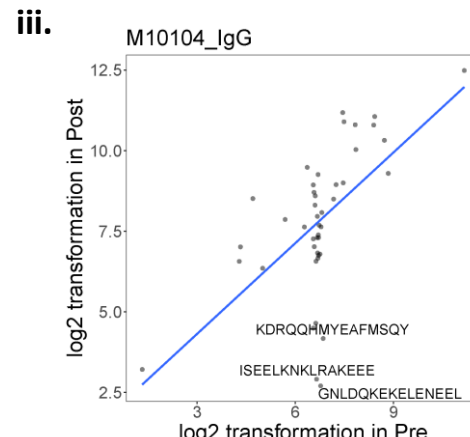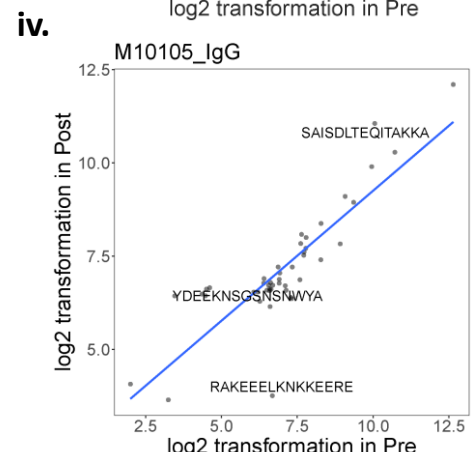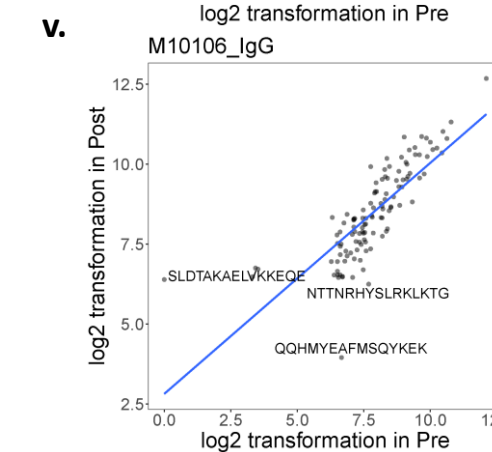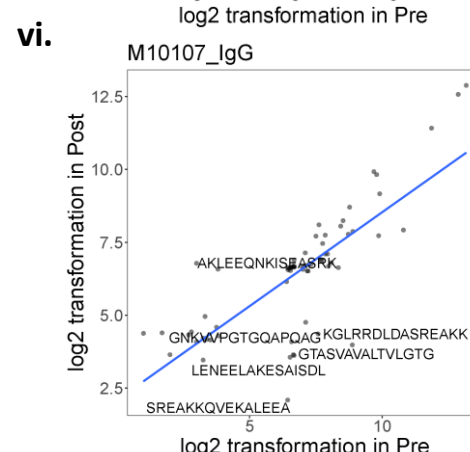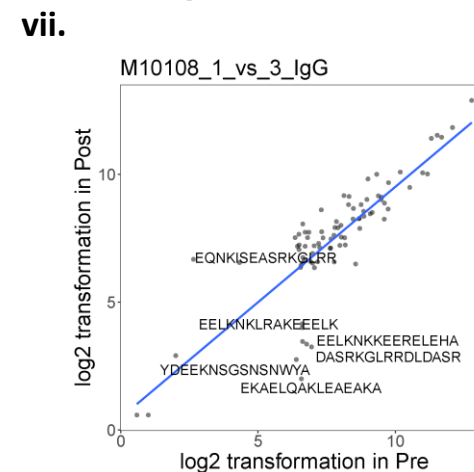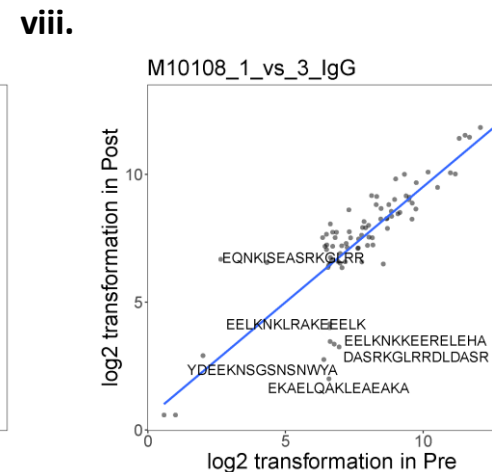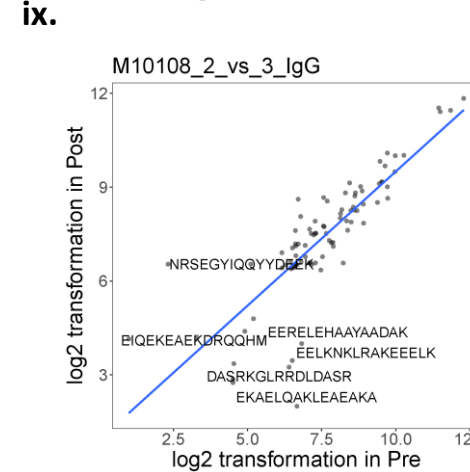

Supplement: mct-23-0652_supplemental_figure_5_suppsf5.pdf [file mct-23-0652_supplemental_figure_5_suppsf5.pdf]
