# Supplementary material for: First-in-Human Stage III/IV Melanoma Clinical Trial of Immune Priming Agent IFx-Hu2.0
Source: PubMed Central journal article supplement — Mol Cancer Ther. 2024 Apr 24;23(8):1139–43. doi: 10.1158/1535-7163.MCT-23-0652 (PMC11292317; doi:10.1158/1535-7163.mct-23-0652), 2024-04-24

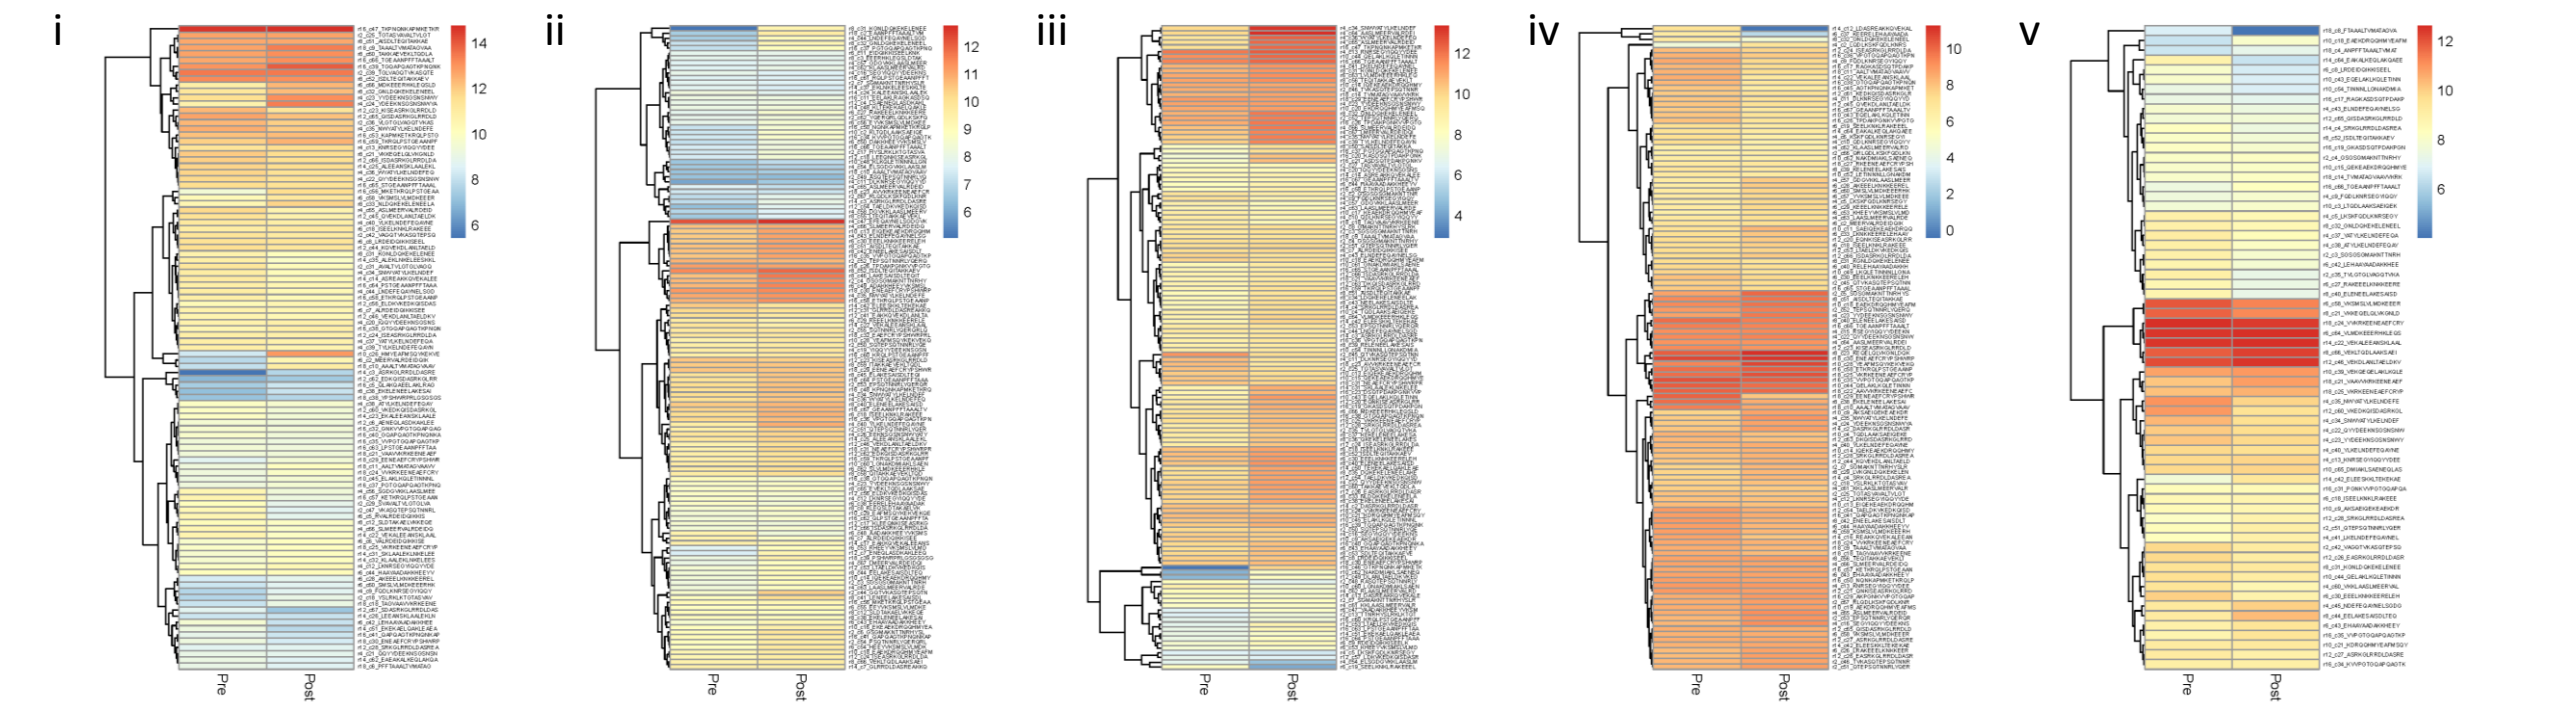

Supplemental Figure 6: Emm55 specific peptides responsible for IgM responses pre and post-treatment on individual patients.

i: M10101  
 ii: M10103  
 iii: M10104  
 iv: M10105  
 v: M10106  
 vi: M10107  
 vii: M10108 (pre vs post 1<sup>st</sup> injection)  
 viii: M10108 (pre vs post 2<sup>nd</sup> injection)  
 ix: M10108 (pre 2<sup>nd</sup> injection (~4 weeks post 1<sup>st</sup> injection) vs post 2<sup>nd</sup> injection)

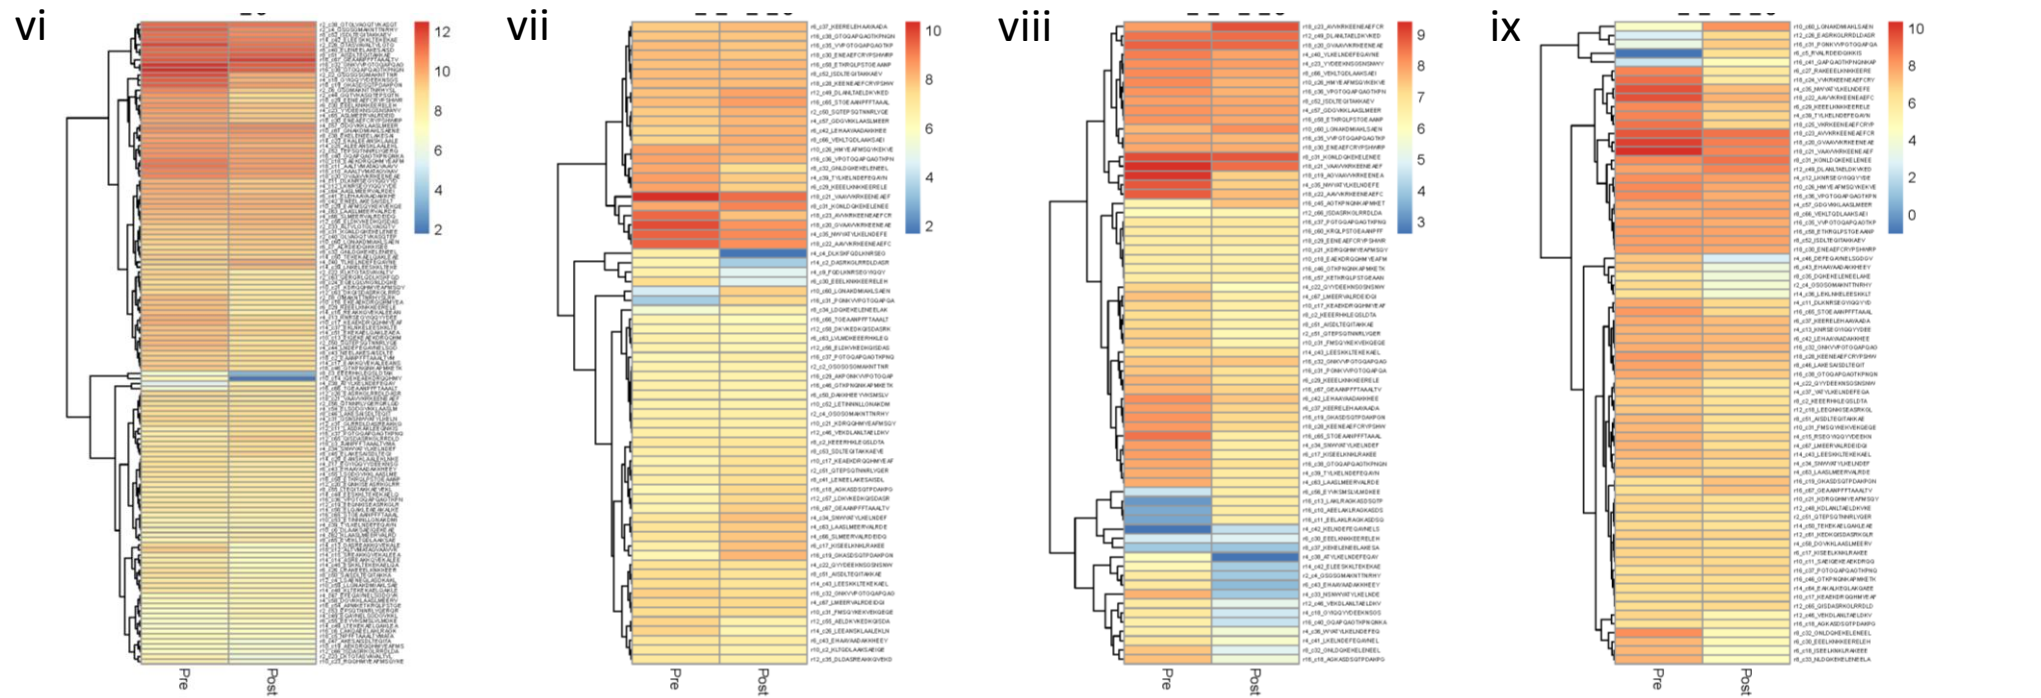

Supplement: mct-23-0652_supplemental_figure_6_suppsf6.pdf [file mct-23-0652_supplemental_figure_6_suppsf6.pdf]
