# Supplementary material for: First-in-Human Stage III/IV Melanoma Clinical Trial of Immune Priming Agent IFx-Hu2.0
Source: PubMed Central journal article supplement — Mol Cancer Ther. 2024 Apr 24;23(8):1139–43. doi: 10.1158/1535-7163.MCT-23-0652 (PMC11292317; doi:10.1158/1535-7163.mct-23-0652), 2024-04-24
Supplement: mct-23-0652_supplemental_figure_8_suppsf8.pdf [file mct-23-0652_supplemental_figure_8_suppsf8.pdf]

**Supplemental Figure 8: Nucleic Acid Sequence of pAc/emm55 Construct with Amino Acid Translation**

|                                                                                                                                                                          |                                                                                                                                                                                                                                                                                                                                                                                                                                                                                                                                                                                                                                                                                                                                                                                                                                                                                                                                                                                                                                                                                                                                                                                                                                                                                                                                                                                                                                                                                                                                                                                                                                                                                                                                                                                                                                                                                                                                                                                                                                                                                                                                                                                                                                                                                                                                                                                                                                                                                                                                                                                                                                                      |
|--------------------------------------------------------------------------------------------------------------------------------------------------------------------------|------------------------------------------------------------------------------------------------------------------------------------------------------------------------------------------------------------------------------------------------------------------------------------------------------------------------------------------------------------------------------------------------------------------------------------------------------------------------------------------------------------------------------------------------------------------------------------------------------------------------------------------------------------------------------------------------------------------------------------------------------------------------------------------------------------------------------------------------------------------------------------------------------------------------------------------------------------------------------------------------------------------------------------------------------------------------------------------------------------------------------------------------------------------------------------------------------------------------------------------------------------------------------------------------------------------------------------------------------------------------------------------------------------------------------------------------------------------------------------------------------------------------------------------------------------------------------------------------------------------------------------------------------------------------------------------------------------------------------------------------------------------------------------------------------------------------------------------------------------------------------------------------------------------------------------------------------------------------------------------------------------------------------------------------------------------------------------------------------------------------------------------------------------------------------------------------------------------------------------------------------------------------------------------------------------------------------------------------------------------------------------------------------------------------------------------------------------------------------------------------------------------------------------------------------------------------------------------------------------------------------------------------------|
| <p><b>Molecular Formula: plasmid DNA sequence with emm55 gene insert highlighted in grey</b></p> <p><b>Start and stop codons in green and red font, respectively</b></p> | <pre> TCCTGCGTTATCCCCTGATTCTGTGGATAACCGTATTACCGCCATGCATTAGT TATTAATAGTAATCAATTACGGGGTCATTAGTTCATAGCCCATATATGGAGTT CCGCGTTACATAAATTACGGTAAATGGCCCGCCTGGCTGACCGCCCAACGACC CCCGCCATTGACGTCAATAATGACGTATGTTCCCATAGTAACGCCAATAGGG ACTTTCCATTGACGTCAATGGGTGGAGTATTTACGGTAAACTGCCCACTTGGC AGTACATCAAGTGTATCATATGCCAAGTACGCCCCCTATTGACGTCAATGACG GTAAATGGCCCGCCTGGCATTATGCCAGTACATGACCTTATGGGACTTTCCT ACTTGGCAGTACATCTACGTATTAGTCATCGCTATTACCATGGTGATGCGGTT TTGGCAGTACATCAATGGGCGTGGATAGCGGTTTACTCACGGGGATTTCCAA GTCTCCACCCCATGACGTCAATGGGAGTTTGTTTTGGCACCAAATCAACGG GACTTTCAAAAATGTCGTAACAACCTCCGCCCATTTGACGCAAATGGGCGGTAG GCGTGTACGGTGGGAGGTCTATATAAGCAGAGCTGGTTTAGTGAACCGTCAGA TCCGCTAGCGCTACCGGACTCAGATCTCGAGCTCAAGCTTCGAATTCTGCAGT CGACGGTACCGCGGGCCCGGGATCCATAAGGAGCATAAAAAATGGCTAAAAATA CCACGAATAGACACTATTTCGCTTAGAAAAATAAAAACAGGAACGGCTTCAGTA GCAGTAGCTTTGACTGTTTTAGGGACAGGACTGGTAGCAGGGCAGACAGTAAA AGCAAGCCAAACAGAACCATCTCAGACCAATAACAGATTATATCAAGAAAAGAC AACGTTTACAGGATTTAAAAAGTAAGTTTCAAGACCTGAAAAATCGTTCAGAG GGATACATTCAGCAATACTACGACGAAGAAAAGAACAGTGGAAGTAACTCTAA CTGGTACGCAACCTACTTAAAAGAATTAAATGACGAATTTGAACAAGCTTATA ATGAACTTAGTGGTGATGGTGTAAAAAAATTAGCTGCAAGTTTGATGGAAGAA AGAGTCGCTTTAAGAGACGAAATCGATCAGATTAAGAAAATATCAGAAGAATT AAAAAATAAGCTGAGAGCAAAAGAAGAATTAAAAAATAAAAAAGAGGAAC GTGAGCTTGAGCATGCTGCCTATGCAGCAGATGCAAAGAAACATGAAGAATAT GTCAAATCCATGTCTCTCGTACTAATGGATAAAGAAGAGGAGCGTCATAAACT AGAGCAATCATTAGACACGGCTAAAGCTGAGCTTGTTAAAAAAGAGCAAGAGT TACAGTTAGTCAAAGGCAATCTAGATCAAAAAGAAAAGAACTAGAAAATGAA GAGCTAGCGAAAAGAAAGTGCTATTAGTGATTTGACTGAGCAGATTACTGCTAA GAAGGCTGAAGTAGAAAAATTAACCTCAAGATTTAGCTGCTAAGTCTGCTGAAA TTCAGGAAAAAGAAAGCTGAAAAAGATCGCCAACAGCATATGTACGAAGCGTTT ATGAGCCAGTACAAAGAAAAAGTTGAGAAAACAAGAGCAAGAGCTTGCTAAGCT AAAACAACCTTGAAACCATCAACAACAATCTATTAGGTAATGCTAAGGATATGA TAGCTAAGTTGTCTGCTGAAAATGAACAATTAGCAAGCGACAAAGCAAAACTT GAAGAACAAAACAAGATTTCAGAAGCGAGCCGTAAAGGTCTTCGTCTGACTT GGACGCATCACGTGAAGCTAAGAAACAAGTTGAAAAGATTTAGCAAACCTTGA CTGCTGAACTTGATAAGGTTAAAGAAGATAAACAAATTTAGACGCAAGCCGT AAAGGTCTTCGTCTGACTTGGACGCATCACGTGAAGCTAAGAAACAAGTTGA AAAAGCTTTAGAAGAAGCAAAACAGCAAATTAGCGGCTCTTGAAAACCTTAACA AAGAGCTTGAAAGAAAGCAAGAAATTAACAGAAAAGAAAAGCTGAGCTACAA GCGAAACTTGAAAGCAGAAGCAAAAGCACTCAAAGAACAATTAGCGAAACAAGC TGAAGAACTTGCAAACCTAAGAGCTGGAAAAGCATCAGACTCACAAACCCCTG ATGCAAAACCAGGAAACAAAGTTGTTCCAGGTACAGGTCAAGCACCACAAGCA GGCACAAAACCTAACCAAAACAAAGCACCAATGAAGGAAACTAAGAGACAGTT ACCATCAACAGGTGAAGCAGCTAATCCATTCTTTACAGCGGCAGCCCTTACTG TTATGGCAACAGCTGGAGTAGCAGCAGTTGTA AACCGCAAAGAAGAAAACGAA GCTGAATTCTGCAGATATCCATCACACTGGCGGCCGCGACTCTAGATCATAAT CAGCCATACCACATTTGTAGAGTTTTACTTGCTTTAAAAAACCTCCCACACC </pre> |
|--------------------------------------------------------------------------------------------------------------------------------------------------------------------------|------------------------------------------------------------------------------------------------------------------------------------------------------------------------------------------------------------------------------------------------------------------------------------------------------------------------------------------------------------------------------------------------------------------------------------------------------------------------------------------------------------------------------------------------------------------------------------------------------------------------------------------------------------------------------------------------------------------------------------------------------------------------------------------------------------------------------------------------------------------------------------------------------------------------------------------------------------------------------------------------------------------------------------------------------------------------------------------------------------------------------------------------------------------------------------------------------------------------------------------------------------------------------------------------------------------------------------------------------------------------------------------------------------------------------------------------------------------------------------------------------------------------------------------------------------------------------------------------------------------------------------------------------------------------------------------------------------------------------------------------------------------------------------------------------------------------------------------------------------------------------------------------------------------------------------------------------------------------------------------------------------------------------------------------------------------------------------------------------------------------------------------------------------------------------------------------------------------------------------------------------------------------------------------------------------------------------------------------------------------------------------------------------------------------------------------------------------------------------------------------------------------------------------------------------------------------------------------------------------------------------------------------------|

TCCCCCTGAACCTGAAACATAAAATGAATGCAATTGTTGTTGTTAACTTGTTT  
ATTGCAGCTTATAATGGTTACAAATAAAGCAATAGCATCACAAATTTACAAA  
TAAAGCATTTTTTTTCACTGCATTCTAGTTGTGGTTTGTCCAAACTCATCAATG  
TATCTTAAGGCGTAAATTGTAAGCGTTAATATTTTTGTTAAAATTCGCGTTAAA  
TTTTTGTAAATCAGCTCATTTTTTAACCAATAGGCCGAAAATCGGCAAAAATCC  
CTTATAAATCAAAGAATAGACCGAGATAGGGTTGAGTGTGTTCCAGTTTGG  
ACAAGAGTCCACTATTAAGAAGCTGGACTCCAACGTCAAAGGGCGAAAAAC  
CGTCTATCAGGGCGATGGCCACTACGTGAACCATCACCTAATCAAGTTTTT  
TGGGGTTCGAGGTGCCGTAAAGCACTAAATCGGAACCCTAAAGGGAGCCCCGA  
TTTAGAGCTTGACGGGGAAAGCCGGCGAACGTGGCGAGAAAAGGAAGGGAAAGAA  
AGCGAAAGGAGCGGGCGCTAGGGCGCTGGCAAGTGTAGCGGTCACGCTGCGCG  
TAACCACCACACCCGCCGCGCTTAATGCGCCGCTACAGGGCGCGTCAGGTGGC  
ACTTTTCGGGGAAATGTGCGCGGAACCCCTATTTGTTTATTTTTCTAAATACA  
TTCAAATATGTATCCGCTCATGAGACAATAACCCTGATAAATGCTTCAATAAT  
ATTGAAAAGGAAGAGTCTTGAGGCGAAAAGAACAGCTGTGGAATGTGTGTC  
AGTTAGGGTGTGGAAAGTCCCCAGGCTCCCCAGCAGGCAGAAGTATGCAAAGC  
ATGCATCTCAATTAGTCAGCAACCAGGTGTGGAAAGTCCCCAGGCTCCCCAGC  
AGGCAGAAGTATGCAAAGCATGCATCTCAATTAGTCAGCAACCATAGTCCCCGC  
CCCTAACTCCGCCCATCCCCGCCCTAACTCCGCCCAGTTCGCCCATTTCTCCG  
CCCCATGGCTGACTAATTTTTTTTTATTTATGCAGAGGCCGAGGCCGCTCGGC  
CTCTGAGCTATTCCAGAAGTAGTGAGGAGGCTTTTTTGGAGGCCTAGGCTTTT  
GCAAAGATCGATCAAGAGACAGGATGAGGATCGTTTTCGCATGATTGAACAAGA  
TGGATTGCACGCAGGTTCTCCGGCCGCTTGGGTGGAGAGGCTATTCCGGCTATG  
ACTGGGCACAACAGACAATCGGCTGCTCTGATGCCGCCGTGTTCCGGCTGTCA  
GCGCAGGGGCGCCCGTTCTTTTTGTCAAGACCGACCTGTCCGGTGCCTGAA  
TGAAGTCAAGACGAGGCAGCGCGGCTATCGTGGCTGGCCACGACGGGCGTTC  
CTTGCGCAGCTGTGCTCGACGTTGTCACTGAAGCGGAAGGGACTGGCTGCTA  
TTGGGCGAAGTGCCGGGGCAGGATCTCCTGTCATCTCACCTTGCTCCTGCCGA  
GAAAGTATCCATCATGGCTGATGCAATGCGGCGGCTGCATACGCTTGATCCGG  
CTACCTGCCCATTCGACCACCAAGCGAAAACATCGCATCGAGCGAGCACGTACT  
CGGATGGAAGCCGGTCTTGTGATCAGGATGATCTGGACGAAGAGCATCAGGG  
GCTCGCGCCAGCCGAAGTTCGCCAGGCTCAAGGCGAGCATGCCCGACGGCG  
AGGATCTCGTCGTGACCCATGGCGATGCCTGCTTGCCGAATATCATGGTGGAA  
AATGGCCGCTTTTCTGGATTCATCGACTGTGGCCGGCTGGGTGTGGCGGACCG  
CTATCAGGACATAGCGTTGGCTACCCGTGATATTGCTGAAGAGCTTGGCGGCG  
AATGGGCTGACCGCTTCTCGTGCTTTACGGTATCGCCGCTCCCGATTTCGAG  
CGCATCGCCTTCTATCGCCTTCTTGACGAGTCTTCTGAGCGGGACTCTGGGG  
TTCGAAATGACCGACCAAGCGACGCCAACCTGCCATCACGAGATTTTCGATTC  
CACCGCCGCTTCTATGAAAGGTTGGGCTTCGGAATCGTTTTCCGGGACGCCG  
GCTGGATGATCCTCCAGCGCGGGGATCTCATGCTGGAGTCTTTCGCCACCCCT  
AGGGGGAGGCTAACTGAAACACGGAAGGAGACAATACCGGAAGGAACCCGCGC  
TATGACGGCAATAAAAAGACAGAATAAAACGCACGGTGTGGGTGTTTTGTTT  
ATAAACGCGGGGTTCCGGTCCCAGGGCTGGCACTCTGTGATACCCACCGAGA  
CCCCATTGGGGCCAATACGCCCGGTTTTCTTCTTTTCCCCACCCACCCCCC  
AAGTTCCGGTGAAGGCCAGGGCTCGCAGCCAACGTCCGGGCGGCAGGCCCTG  
CCATAGCCTCAGGTTACTCATATATACTTTAGATTGATTTAAAACCTTCATTTT  
TAATTTAAAAGGATCTAGGTGAAGATCCTTTTTGATAATCTCATGACCAAAAT  
CCCTTAACGTGAGTTTTTCGTTCCACTGAGCGTCAGACCCCGTAGAAAAGATCA  
AAGGATCTTCTTGAGATCCTTTTTTTCTGCGGTAATCTGCTGCTTGCAAACA  
AAAAAACACCGCTACCAGCGGTGGTTTTGTTTGGCCGATCAAGAGCTACCAAC  
TCTTTTTCCGAAGGTAAGTGGCTTCAGCAGAGCGCAGATACCAATACTGTTT

|                                                                                          |                                                                                                                                                                                                                                                                                                                                                                                                                                                                                                                                                                                                                                                                |
|------------------------------------------------------------------------------------------|----------------------------------------------------------------------------------------------------------------------------------------------------------------------------------------------------------------------------------------------------------------------------------------------------------------------------------------------------------------------------------------------------------------------------------------------------------------------------------------------------------------------------------------------------------------------------------------------------------------------------------------------------------------|
|                                                                                          | <p>TTCTAGTGTAGCCGTAGTTAGGCCACCCTTCAAGAACTCTGTAGCACCGCCT<br/> ACATACCTCGCTCTGCTAATCCTGTTACCAGTGGCTGCTGCCAGTGGCGATAA<br/> GTCGTGTCTTACCGGGTTGGACTCAAGACGATAGTTACCGGATAAGGCGCAGC<br/> GGTCGGGCTGAACGGGGGGTTCGTGCACACAGCCCAGCTTGGAGCGAACGACC<br/> TACACCGAACTGAGATACCTACAGCGTGAGCTATGAGAAAAGCGCCACGCTTCC<br/> CGAAGGGAGAAAAGGCGGACAGGTATCCGGTAAGCGGCAGGGTCGGAACAGGAG<br/> AGCGCACGAGGGAGCTTCCAGGGGGAAACGCCTGGTATCTTTATAGTCCTGTC<br/> GGTTTTCGCCACCTCTGACTTGAGCGTCGATTTTTGTGATGCTCGTCAGGGGG<br/> GCGGAGCCTATGGAAAACGCCAGCAACGCGGCCTTTTTACGGTTCCTGGCCT<br/> TTTGCTGGCCTTTTGCTCACATGTTCTT</p>                                                                         |
| <p><b>Amino acid<br/> translation of<br/> emm55 gene<br/> sequence (566<br/> AA)</b></p> | <p>MAKNTTNRHYSLRKLKTGTASVAVALTVLGTGLVAGQTVKASQTEPSQTNRL<br/> YQERQRLQDLKSKFQDLKNRSEGYIQYYDEEKNSGNSNWNWYATYLKELNDEF<br/> EQAYNELSGDGVKKLAASLMEERVALRDEIDQIKKISEELKNKLRAKEEELKN<br/> KKEERELEHAA YAADAKKHEEYVKSMSLVLM DKEEERHKLEQSLDTAKAELVK<br/> KEQELQLVKG NLDQKEKELENEELAKESAI SDLTEQITAKKAEVEKLTQDLAA<br/> KSAEIQEKEAEKDRQQHMYEAFMSQYKEKVEKQEQLAKLKQLETINNNLLGN<br/> AKDMI AKLSAENEQLASDKAKLEE QNKI SEASRKGLRRDLASREAKKQVEKD<br/> LANLTAELDKVKEDKQISDASRKGLRRDLASREAKKQVEKALEEANSKLAAL<br/> EKLNKELEESKLT EKEKAE LQAKLEAEAKALKEQLAKQAEELAKLRAGKASD<br/> SQTPDAKPGNKVVPGTGQAPQAGTKPNQNKAPMKETKRQLPSTGEAANPFFTA<br/> AALTVMATAGVA AVVKRKEENEAEFCRYPSHWRPRL</p> |
