# Supplementary material for: First-in-Human Stage III/IV Melanoma Clinical Trial of Immune Priming Agent IFx-Hu2.0
Source: PubMed Central journal article supplement — Mol Cancer Ther. 2024 Apr 24;23(8):1139–43. doi: 10.1158/1535-7163.MCT-23-0652 (PMC11292317; doi:10.1158/1535-7163.mct-23-0652), 2024-04-24
Supplement: mct-23-0652_supplemental_table_1_suppst1.pdf [file mct-23-0652_supplemental_table_1_suppst1.pdf]

| Patient | Age | Gender | Race  | Ethnicity    | ECOG | Stage | BRAF  |
|---------|-----|--------|-------|--------------|------|-------|-------|
| M10101  | 66  | Female | White | Non-Hispanic | 2    | III   | WT    |
| M10103  | 70  | Female | White | Non-Hispanic | 1    | III   | K601N |
| M10104  | 60  | Male   | White | Non-Hispanic | 1    | IV    | V600E |
| M10105  | 73  | Male   | White | Non-Hispanic | 0    | IV    | WT    |
| M10106  | 66  | Male   | White | Non-Hispanic | 0    | IV    | WT    |
| M10107  | 71  | Male   | White | Non-Hispanic | 0    | III   | WT    |
| M10108  | 85  | Female | White | Non-Hispanic | 1    | III   | WT    |

Supplemental Table 1a: Demographics of the patient population eligible for the trial.

| Total (n = 7)                       | RELATED |       | UNRELATED |         |         |         |         |
|-------------------------------------|---------|-------|-----------|---------|---------|---------|---------|
| AE Preferred Term                   | Grade   | Grade | Grade 1   | Grade 2 | Grade 3 | Grade 4 | Grade 5 |
| <b>M10101</b>                       |         |       |           |         |         |         |         |
| Flatulence                          | 0       | 0     | 1         | 0       | 0       | 0       | 0       |
| Hypertension                        | 0       | 0     | 0         | 1       | 1       | 0       | 0       |
| Pneumatosis                         | 0       | 0     | 0         | 0       | 1       | 0       | 0       |
| <b>M10103</b>                       |         |       |           |         |         |         |         |
| <b>Injection site reaction</b>      |         |       |           |         |         |         |         |
| Erythema w/ Pruritis                | 0       | 1     | 0         | 0       | 0       | 0       | 0       |
| Erythema/Pain                       | 1       | 0     | 0         | 0       | 0       | 0       | 0       |
| <b>M10104</b>                       |         |       |           |         |         |         |         |
| <b>Injection site reaction</b>      |         |       |           |         |         |         |         |
| Erythema                            | 1       | 0     | 0         | 0       | 0       | 0       | 0       |
| Lymphocyte count decreased          | 1       | 0     | 0         | 0       | 0       | 0       | 0       |
| Lymphoedema                         | 0       | 0     | 1         | 0       | 0       | 0       | 0       |
| <b>M10105</b>                       |         |       |           |         |         |         |         |
| Back pain                           | 1       | 0     | 0         | 0       | 0       | 0       | 0       |
| Clostridial sepsis                  | 0       | 0     | 0         | 0       | 0       | 0       | 1       |
| Constipation                        | 0       | 0     | 0         | 1       | 0       | 0       | 0       |
| Decreased appetite                  | 0       | 0     | 1         | 0       | 0       | 0       | 0       |
| Dry mouth                           | 0       | 0     | 1         | 0       | 0       | 0       | 0       |
| <b>Injection site reaction</b>      |         |       |           |         |         |         |         |
| Erythema                            | 1       | 0     | 0         | 0       | 0       | 0       | 0       |
| Pruritus                            | 1       | 0     | 0         | 0       | 0       | 0       | 0       |
| Insomnia                            | 0       | 0     | 1         | 0       | 0       | 0       | 0       |
| Multiple organ dysfunction syndrome | 0       | 0     | 0         | 0       | 0       | 1       | 0       |
| Muscle spasms                       | 0       | 0     | 1         | 0       | 0       | 0       | 0       |
| <b>M10106</b>                       |         |       |           |         |         |         |         |
| <b>Injection site reaction</b>      |         |       |           |         |         |         |         |
| Erythema                            | 1       | 0     | 0         | 0       | 0       | 0       | 0       |
| <b>M10107</b>                       |         |       |           |         |         |         |         |
| Constipation                        | 0       | 0     | 0         | 1       | 0       | 0       | 0       |
| Diverticulitis                      | 0       | 0     | 0         | 1       | 0       | 0       | 0       |
| Fatigue                             | 0       | 0     | 1         | 0       | 0       | 0       | 0       |
| <b>Injection site reaction</b>      |         |       |           |         |         |         |         |
| Site reaction                       | 1       | 0     | 0         | 0       | 0       | 0       | 0       |
| Hypo aesthesia                      | 1       | 0     | 0         | 0       | 0       | 0       | 0       |
| Insomnia                            | 0       | 0     | 1         | 0       | 0       | 0       | 0       |
| Pruritus                            | 1       | 0     | 0         | 0       | 0       | 0       | 0       |
| Tumor hemorrhage                    | 1       | 0     | 0         | 0       | 0       | 0       | 0       |
| <b>M10108</b>                       |         |       |           |         |         |         |         |
| <b>Injection site reaction</b>      |         |       |           |         |         |         |         |
| Erythema                            | 1       | 0     | 0         | 0       | 0       | 0       | 0       |
| Tumor Hemorrhage                    | 2       | 0     | 0         | 0       | 0       | 0       | 0       |
| Tumor Pain                          | 0       | 2     | 0         | 0       | 0       | 0       | 0       |

Supplemental Table 1b: Related and unrelated adverse events to Ix-Hu2.0
