# Supplementary material for: First-in-Human Stage III/IV Melanoma Clinical Trial of Immune Priming Agent IFx-Hu2.0
Source: PubMed Central journal article supplement — Mol Cancer Ther. 2024 Apr 24;23(8):1139–43. doi: 10.1158/1535-7163.MCT-23-0652 (PMC11292317; doi:10.1158/1535-7163.mct-23-0652), 2024-04-24
Supplement: mct-23-0652_supplemental_table_2_suppst2.pdf [file mct-23-0652_supplemental_table_2_suppst2.pdf]

| Patient | Number of lesions injected | Number of time points injected | Response 30 days after injection | Prior lines of therapy                                                 | Prior anti-PD1 therapy | Time to next treatment with progression post-protocol anti-PD1-based therapy (maximum response) | Time to next treatment under observation |
|---------|----------------------------|--------------------------------|----------------------------------|------------------------------------------------------------------------|------------------------|-------------------------------------------------------------------------------------------------|------------------------------------------|
| M10101  | 1                          | 1                              | SD                               | 3 (Pembrolizumab, ipilimumab, carbo/taxol)                             | Yes                    | 1337 ongoing (SD) <sup>c</sup>                                                                  | -                                        |
| M10103  | 3                          | 1                              | SD                               | 0 <sup>a</sup>                                                         | No                     | 313 (PR)                                                                                        | -                                        |
| M10104  | 3                          | 1                              | PD                               | 2 (pembrolizumab, dabrafenib/trametinib)                               | Yes                    | 395 (PR)                                                                                        | -                                        |
| M10105  | 3                          | 1                              | N.E.                             | 3 (clinical trial, pembrolizumab)                                      | Yes                    | -                                                                                               | -                                        |
| M10106  | 1                          | 1                              | SD                               | 4 (Pembrolizumab, Clinical Trial, TVEC/ Pembrolizumab, Clinical Trial) | Yes                    | 199 (SD)                                                                                        | -                                        |
| M10107  | 2                          | 1                              | PD                               | 2, (TVEC, clinical trial with anti-PD1)                                | Yes                    | 608 (PR) <sup>d</sup>                                                                           | -                                        |
| M10108  | 2                          | 2                              | PD                               | 0 <sup>b</sup>                                                         | No                     | -                                                                                               | 403                                      |

**Supplemental Table 2:** In this table, the response at 30 days and whether a patient received prior anti-PD1 therapy are depicted. The reactions to anti-PD1 therapy post-treatment suggest that IFx-Hu2.0 may be the prime response to checkpoint blockade. In addition, one patient experienced stable disease after the conclusion of the protocol therapy with no further treatment. <sup>a</sup>contraindications to anti-PD1 therapy; had Grade 3 complications post trial to anti-PD1 therapy. <sup>b</sup>Elderly patient within transit disease only with no systemic disease and declined anti-PD1 therapy. <sup>c</sup>patient elected for definitive surgery 868 days after post-therapy anti-PD1 therapy and has no recurrence as of 1337 days. <sup>d</sup>The patient had consolidative surgery as part of treatment plan after a good PR to anti-PD1 based therapy at 252 days and the time to the next therapy was 608 days.
